# Supplementary material for: Coagulation factor XII protease domain crystal structure
Source: PubMed Central journal article supplement (PMC4418343; doi:10.1111/jth.12849), 2015-03-11
Supplement: jth0013-0580-sd2.pdf [file jth0013-0580-sd2.pdf]

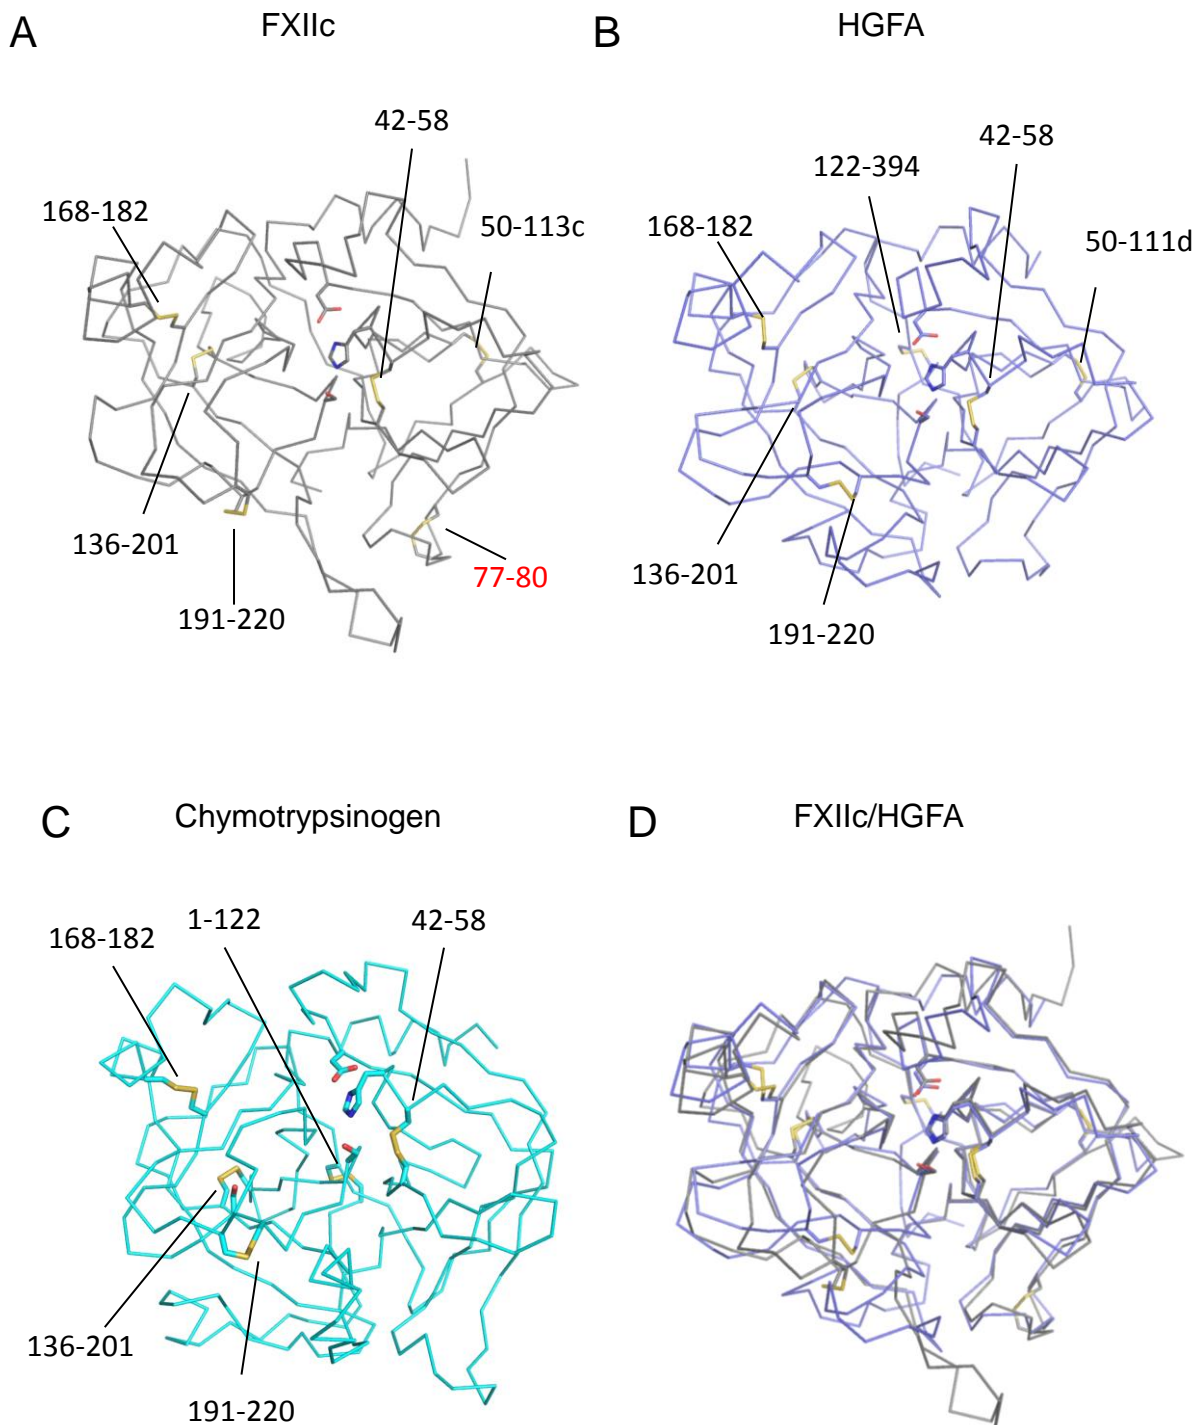

**Fig. S2. FXIIc disulphide bonds and structural comparisons with the protease HGFA and chymotrypsinogen.** C- $\alpha$  traces are displayed for (A) FXIIc, (B) HGFA protease (pdb:1YC0), (C) chymotrypsinogen (pdb:2CGA) and (D) FXIIc (grey) and HGFA (purple) superposed. Disulphide bonds are colored yellow. Catalytic triad residues are illustrated as sticks in each case. Labelled in red is the disulphide bond unique to FXII.
